# Supplementary material
Source: PubMed Central journal article supplement (PMC3591975)
Supplement: AEM.03392-12_zam999104151so3.pdf [file AEM.03392-12_zam999104151so3.pdf]

Table S2. 16S rRNA sequences retrieved from clone libraries that were established from the *Ca. Nitrospira deluvii* enrichment with preceding treatment by LNAzymes targeting *Ca. N. defluvii*.

| Next cultured relative (identity)             | Next uncultured relative, GenBank accession no. (identity)      | Sequences from 8F - 907R RNA library | Sequences from 8F - 1492R RNA library | Sequences from 8F - 907R DNA library |
|-----------------------------------------------|-----------------------------------------------------------------|--------------------------------------|---------------------------------------|--------------------------------------|
| <b>Betaproteobacteria</b>                     |                                                                 |                                      |                                       |                                      |
| <i>Methyloversatilis universalis</i> (99.1 %) | denitrifying sequencing batch reactor clone, HQ703525 (99.9 %)  |                                      | 2                                     |                                      |
| <i>Methyloversatilis universalis</i> (98.6 %) | denitrifying fluidized bed reactor clone, DQ202141 (99.7 %)     | 1                                    |                                       | 1                                    |
| <i>Rubrivivax gelatinosus</i> (96.5 %)        | activated sludge clone, EU283352 (98.7 %)                       |                                      | 1                                     |                                      |
| <i>Denitratisoma oestradiolicum</i> (91.9 %)  | denitrifying bioreactor clone, FJ167494 (99.7 %)                |                                      | 1                                     |                                      |
| <i>Variovorax paradoxus</i> (99.8 %)          | biofilm on oxygen-transfer membrane clone, AY444994 (99.8 %)    |                                      |                                       | 1                                    |
| <b>Alphaproteobacteria</b>                    |                                                                 |                                      |                                       |                                      |
| <i>Meganema perideroedes</i> (90.8 %)         | soil clone, GQ169020 (98.2 %)                                   | 1                                    | 1                                     | 2                                    |
| <i>Caedibacter caryophilus</i> (88.0 %)       | autotrophic nitrifying biofilm reactor clone, FJ529966 (94.9 %) | 1                                    |                                       |                                      |
| <i>Geminococcus roseus</i> (85.5 %)           | activated sludge clone, HQ385549 (98.8 %)                       | 1                                    |                                       |                                      |
| <i>Rhodobacter litoralis</i> (95.4 %)         | autotrophic nitrifying biofilm reactor clone, FJ529978 (98.4 %) |                                      | 2                                     |                                      |
| <i>Pelagibius litoralis</i> (93.1 %)          | soil clone, HQ727620 (96.13 %)                                  |                                      | 1                                     |                                      |
| <i>Afipia birgiae</i> (99.6 %)                | clean room clone, EU071489 (99.9 %)                             |                                      |                                       | 1                                    |
| <b>Bacteroidetes</b>                          |                                                                 |                                      |                                       |                                      |
| <i>Terrimonas lutea</i> (95.0 %)              | activated sludge clone, FJ536929 (99.3 %)                       | 2                                    |                                       | 2                                    |
| <i>Flexibacter flexilis</i> (83.8 %)          | Hanford site subsurface clone, HM186924 (91.8 %)                | 4                                    | 5                                     | 4                                    |
| <b>Chlorobi</b>                               |                                                                 |                                      |                                       |                                      |
| N.A.                                          | iron snow from acidic coal clone, FR667812 (92.9 %)             | 2                                    |                                       |                                      |
| <b>Gemmatimonadetes</b>                       |                                                                 |                                      |                                       |                                      |
| <i>Gemmatimonas aurantiaca</i> (90.1 %)       | oil seep clone, EF157193 (96.6 %)                               |                                      | 1                                     |                                      |
| <b>Actinobacteria</b>                         |                                                                 |                                      |                                       |                                      |
| <i>Mycobacterium austroafricanum</i> (99.8 %) | indoor dust clone, AM697434 (98.8 %)                            | 2                                    |                                       |                                      |
| <b>Cyanobacteria</b>                          |                                                                 |                                      |                                       |                                      |
| <i>Gloeobacter violaceus</i> (82.7 %)         | human skin clone, JF219539 (100 %)                              | 2                                    |                                       |                                      |
| <b>Deinococcus-Thermus</b>                    |                                                                 |                                      |                                       |                                      |
| <i>Meiothermus ruber</i> (90.7 %)             | compost clone, FN667273 (90.4 %)                                |                                      |                                       | 2                                    |
