# Supplementary material
Source: PubMed Central journal article supplement (PMC3591975)
Supplement: AEM.03392-12_zam999104151so6.pdf [file AEM.03392-12_zam999104151so6.pdf]

**Figure S3 A**

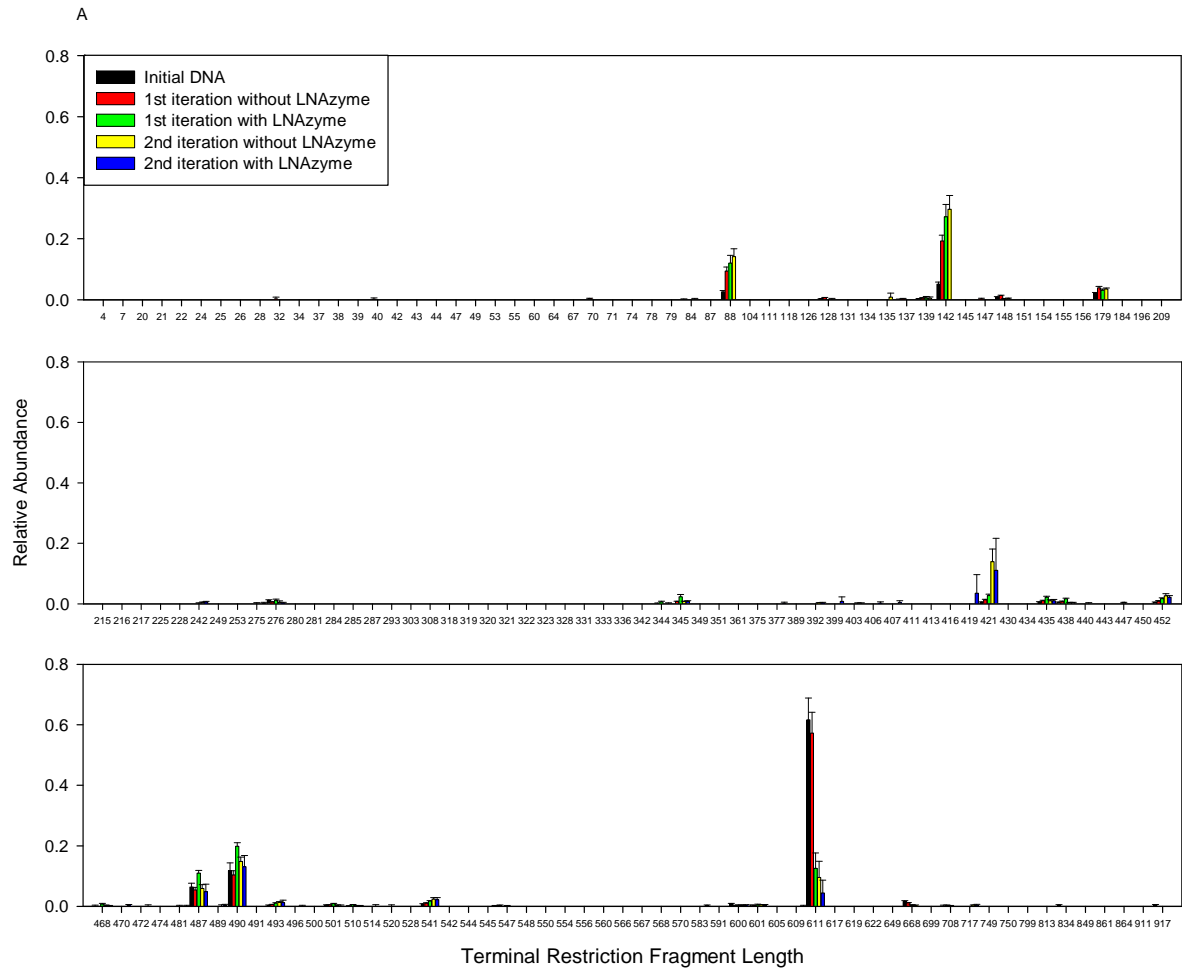

**Figure S3 B**

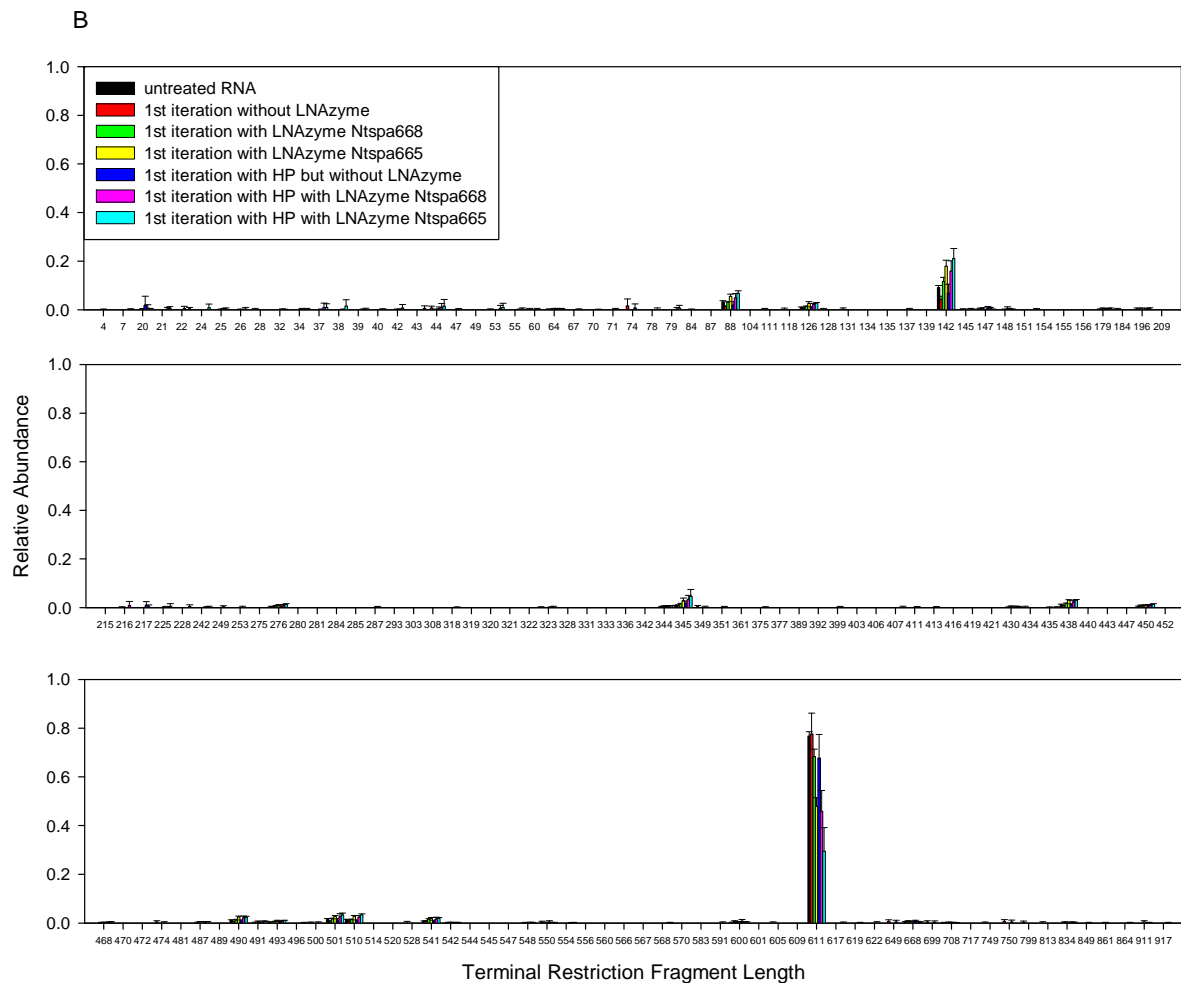

**Fig. S3.** Depletion of the 16S rRNA of *Ca. N. defluvii* from (A) DNA or (B) native RNA that was extracted from the *Ca. N. defluvii* enrichment culture. The bars show the relative abundances of the 16S rRNA genes of *Ca. N. defluvii* and of other bacteria before and after one or two iterations of the LNAzyme-mediated depletion. Control experiments without added LNAzymes are also shown (the second iteration without LNAzyme was performed after a first iteration with LNAzyme). The relative abundances were determined by T-RFLP analysis. This figure shows the complete T-RFLP profiles, whereas Fig. 4 (main text) contains selected peaks only. Applied LNAzymes were Ntspa668 (panel A) and Ntspa668 or Ntspa665 (panel B, which also shows the effects of additional helper probes on the efficiency of target depletion). HP = helper probes. Error bars depict standard deviations of three replicate experiments.
